# Supplementary material
Source: PubMed Central journal article supplement (PMC3494970)
Supplement: NIHMS308913-supplement-03.pdf [file NIHMS308913-supplement-03.pdf]

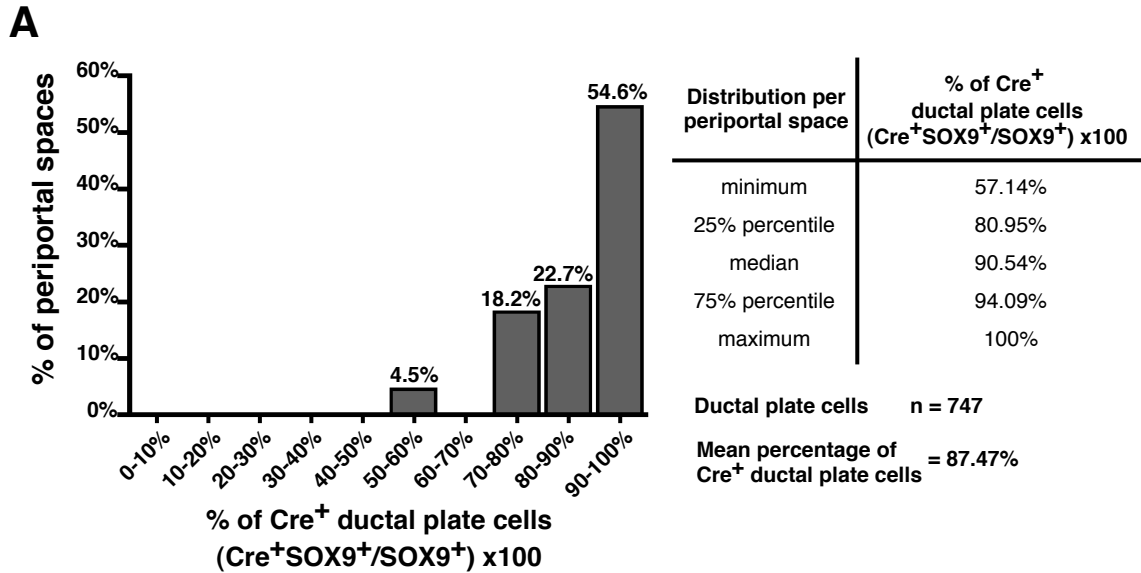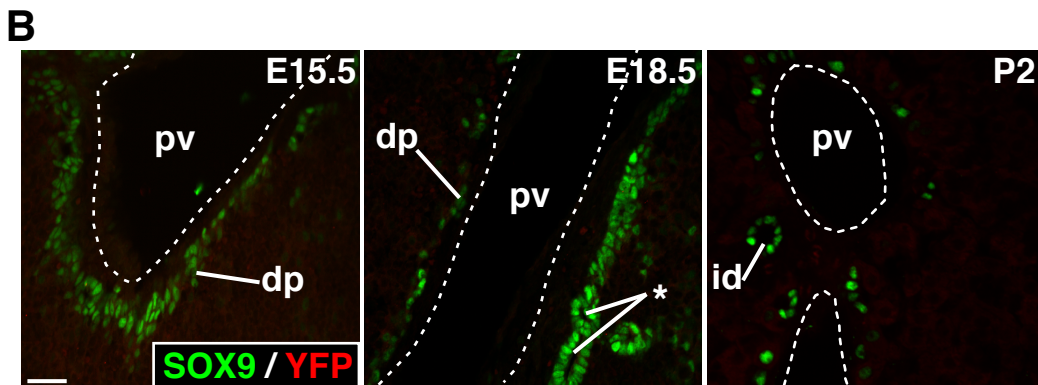

**Supplementary Figure 1.** Expression and activity of *SOX9-CreERT<sup>2</sup>*. (A) Distribution of *CreERT<sup>2</sup>* expression in *SOX9<sup>+</sup>* ductal plate cells. Pregnant females were injected with tamoxifen 18h prior to collection of the liver at E14.5, E15.5 and E16.5. Countings at all stages were pooled. (B) Activity of *SOX9-CreERT<sup>2</sup>* is specific to tamoxifen-treated liver. The livers of *SOX9-CreERT<sup>2</sup>;ROSA26R<sup>YFP</sup>* embryos at E15.5, E18.5 and of *SOX9-CreERT<sup>2</sup>;ROSA26R<sup>YFP</sup>* mice at P2 were immunostained for YFP. In the absence of tamoxifen injection, no YFP is detectable. pv, portal vein ; dp, ductal plate ; \*, lumen of developing duct ; id, interlobular duct.

## Supplementary Figure 1
