# Supplementary material
Source: PubMed Central journal article supplement (PMC3494970)
Supplement: NIHMS308913-supplement-05.pdf [file NIHMS308913-supplement-05.pdf]

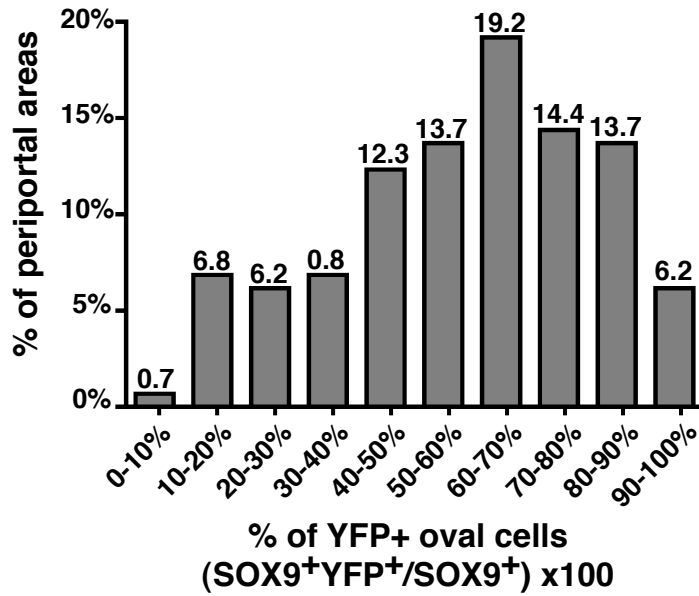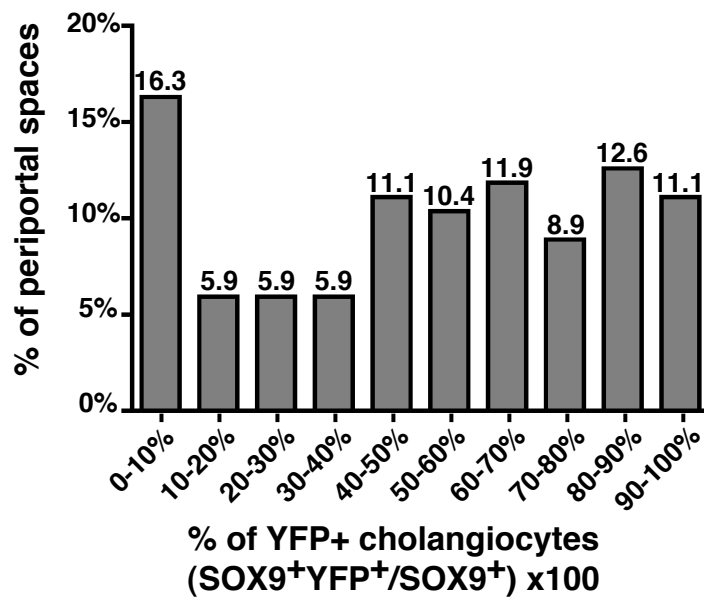

**Supplementary Figure 3.** Origin of oval cells. The distribution of YFP<sup>+</sup> oval cells per periportal area does not correlate with that of the YFP<sup>+</sup> interlobular cholangiocytes.

### Supplementary Figure 3
